# Supplementary material
Source: publisher site journal article supplement (https://www.spandidos-publications.com/4810/downloadSupplementary)
Supplement: Supplementary file 1 [file downloadSupplementary]

## Sheet: Table SI
Table SI. Differentially expressed genes between 1,014 patients with NSCLC and 578 normal samples.
Gene name	log2 FC	P-value
KRT6A	4.24764	1.1296e-09
FAM83A	4.17137	5.70782e-37
AKR1B10	4.12215	1.97034e-13
UBE2C	4.11882	8.06213e-74
SPP1	4.10505	4.23449e-40
GPX2	4.08424	1.46741e-15
CRABP2	4.02797	1.12414e-36
MMP11	4.00966	3.86337e-47
TMPRSS4	3.99736	1.81421e-45
MMP12	3.98734	3.54969e-35
MYBL2	3.95899	3.68065e-64
SLC2A1	3.95079	6.56711e-41
MMP1	3.91008	3.44477e-27
GJB2	3.89094	1.8041e-29
KRT16	3.81642	3.04063e-12
CDC20	3.78857	2.26722e-75
PITX1	3.77705	1.88146e-31
CST1	3.75113	3.72248e-24
TOP2A	3.72103	1.54573e-75
TPX2	3.71943	5.25307e-65
BIRC5	3.68512	1.34865e-66
GPR87	3.66733	7.1648e-21
S100A2	3.56784	1.27423e-15
PRAME	3.53822	4.17535e-19
SERPINB5	3.49203	2.3685e-14
CA9	3.4774	1.79425e-21
KRT17	3.43627	7.63398e-11
PSAT1	3.38223	1.97004e-45
SPRR1B	3.32824	1.00464e-08
CALML3	3.32165	1.0645e-08
FOXM1	3.31945	1.1631e-51
RHOV	3.31746	3.37853e-33
GJB6	3.29888	3.50756e-13
COL17A1	3.29418	8.43722e-17
ANLN	3.28372	1.07166e-62
NEK2	3.25424	3.64978e-70
AURKB	3.24066	6.14179e-59
COL11A1	3.23334	6.8758e-27
RRM2	3.22153	3.27078e-62
UBE2T	3.2165	9.92067e-83
KRT15	3.19257	9.85327e-15
KIF2C	3.18635	2.41377e-64
MELK	3.17871	2.9255e-57
HJURP	3.17506	6.70056e-63
CEP55	3.1672	1.16848e-63
TMPRSS11E	3.1607	9.10368e-20
IGSF9	3.14632	1.87527e-45
LYPD3	3.13876	7.99732e-19
SAPCD2	3.13451	2.80753e-61
COL10A1	3.11192	2.06083e-34
CBLC	3.10857	1.7988e-53
CCNB2	3.09987	5.07475e-61
TROAP	3.09946	1.63682e-53
KRT6B	3.09805	4.05809e-08
DLGAP5	3.07227	1.21866e-62
CTHRC1	3.06607	5.2204e-51
TNS4	3.06326	3.33465e-18
PYCR1	3.05838	4.70012e-77
KIF4A	3.04467	6.63943e-61
CENPA	3.02515	2.55135e-54
DSG3	3.02245	3.13183e-08
PLK1	3.02149	3.62456e-66
CCNB1	3.01022	3.29436e-70
CDC45	3.00665	5.17561e-48
B4GALNT4	3.00172	2.96673e-28
CDCA8	2.99784	2.07577e-67
NUF2	2.99315	1.21681e-57
CCNA2	2.98274	9.77695e-59
NXPH4	2.96807	1.91809e-19
CYP24A1	2.95277	4.93852e-17
PBK	2.95085	1.66853e-49
KIF18B	2.95072	1.35651e-49
TK1	2.95042	3.89926e-58
LY6D	2.94639	2.1248e-10
CDCA5	2.94301	3.35772e-55
CENPF	2.94119	2.9406e-53
PTHLH	2.93015	1.84976e-12
MMP13	2.92672	1.12243e-14
BUB1B	2.92474	2.25118e-57
DSP	2.91555	1.91917e-31
COL7A1	2.91119	7.21565e-17
B3GNT3	2.9072	1.8207e-27
ETV4	2.89489	3.00986e-41
EEF1A2	2.89379	6.71504e-13
CDC6	2.87421	3.16859e-55
FERMT1	2.87113	1.95801e-40
SOX2	2.85568	5.63137e-12
NCAPH	2.85222	4.87141e-52
TFAP2A	2.84716	3.22381e-37
KIF20A	2.84334	7.56651e-65
GJB3	2.83676	7.04255e-18
IQGAP3	2.82854	1.05693e-62
NMU	2.80667	3.53776e-27
MKI67	2.80535	1.44281e-49
NUSAP1	2.79411	8.42142e-59
CDCA7	2.78821	1.30714e-50
HMGB3	2.78815	1.22078e-45
GINS1	2.77967	8.95405e-59
CXCL14	2.77341	6.3096e-14
TRIP13	2.77163	2.17066e-45
CDT1	2.76829	1.29242e-56
FOXE1	2.76514	2.86659e-12
RECQL4	2.75	2.83597e-56
EPN3	2.74134	6.04856e-56
TTK	2.73478	3.9334e-46
BARX1	2.72419	5.60156e-14
ALDH3B2	2.6948	2.33863e-22
KIFC1	2.69167	2.38503e-51
PCLAF	2.68862	3.051e-59
MEX3A	2.68722	8.96708e-40
PKP1	2.6764	2.38218e-07
UHRF1	2.67639	2.55506e-56
UCHL1	2.67639	1.03633e-13
CXCL13	2.67393	8.07634e-19
SPINK1	2.67328	8.96047e-09
ZWINT	2.67061	4.96441e-64
SPAG5	2.65626	3.90773e-55
KIF11	2.64615	3.561e-58
EXO1	2.64563	6.21534e-53
CDKN3	2.64459	2.40151e-47
SPRR1A	2.63758	4.15785e-06
KRT14	2.62958	1.52804e-05
PKMYT1	2.62692	7.0234e-53
PRC1	2.62191	1.60785e-48
NDC80	2.61255	1.81068e-50
SLC7A5	2.61046	3.41004e-31
CDH3	2.60679	2.28259e-23
GTSE1	2.59817	1.80625e-51
CNFN	2.59804	5.35683e-24
GRHL3	2.5961	1.88454e-22
GJB5	2.59359	3.21709e-11
ASF1B	2.58764	4.1701e-55
CDK1	2.5855	7.02368e-48
AURKA	2.57548	5.19665e-56
IVL	2.56864	4.56289e-11
HS6ST2	2.56789	1.11044e-27
GINS2	2.56363	2.62395e-49
NCAPG	2.56092	7.47487e-53
GALNT14	2.55996	1.63859e-25
SLC6A8	2.55308	1.67927e-18
NECTIN1	2.55124	2.20805e-18
KRT5	2.55116	0.000480087
FAM83D	2.5491	3.8381e-29
SKA3	2.54454	1.05013e-56
MMP10	2.54292	2.07326e-09
EFNA3	2.53915	2.17316e-53
PODXL2	2.5349	4.95118e-25
RAD54L	2.53368	7.94271e-46
DEPDC1	2.5318	1.6461e-49
TEDC2	2.52875	4.70209e-66
CDCA3	2.52461	1.33847e-48
GPT2	2.52382	3.21797e-47
MDK	2.50881	3.44717e-39
PIMREG	2.5069	7.47877e-44
FAM83B	2.50576	1.01796e-15
CCNE1	2.50156	6.75467e-43
RPL39L	2.49677	8.08491e-30
SKA1	2.48995	2.38595e-43
SPRR3	2.48339	1.68695e-06
DEPDC1B	2.47366	3.15971e-50
CKAP2L	2.47232	1.42865e-49
ASPM	2.46789	1.85184e-48
GREM1	2.46695	6.20491e-26
BUB1	2.46251	5.21142e-51
AKR1C2	2.46146	3.52763e-07
PTTG1	2.45622	8.52843e-52
PLPP2	2.45509	4.05339e-56
HMMR	2.44886	3.10345e-55
CABYR	2.4467	9.36162e-22
NECTIN4	2.4428	5.47151e-39
DSC3	2.44262	6.02627e-07
SPC24	2.43808	1.093e-51
RMI2	2.43676	2.18411e-58
IQANK1	2.43312	8.91794e-50
KIF23	2.41738	1.48993e-43
RHCG	2.39293	2.84657e-08
ORC6	2.39292	4.25557e-51
PROM2	2.38958	2.82499e-28
SPRR2D	2.386	1.0256e-06
MCM2	2.38083	2.15944e-37
CENPU	2.36742	3.67738e-49
HMGA1	2.3669	1.9252e-49
IL20RB	2.36275	1.57046e-13
LARGE2	2.35728	9.5573e-32
MAD2L1	2.35425	1.16961e-45
MCM4	2.3532	5.9381e-50
SPRR2A	2.34703	3.24691e-05
EZH2	2.33786	1.90377e-51
MCM10	2.33773	7.49945e-44
ECT2	2.32941	2.70023e-42
MND1	2.31937	5.41709e-59
SPTBN2	2.31692	3.78394e-49
PTPRH	2.31537	3.19131e-24
OTX1	2.31361	2.14084e-35
WDR72	2.31094	4.0006e-15
TMEM132A	2.30143	2.05306e-36
ITPKA	2.29633	2.4594e-20
S100A7	2.28691	6.86544e-06
RASAL1	2.28493	1.45794e-39
ORC1	2.28196	1.34915e-44
DLX5	2.26934	6.66339e-13
MAGEA3	2.26626	6.73331e-08
ABCA12	2.26334	6.6715e-27
KIF14	2.26241	7.47387e-46
ADGRF4	2.25329	4.47056e-21
TNFRSF18	2.2505	8.94758e-25
ADM2	2.24804	5.5941e-41
MELTF	2.24704	6.85975e-23
PLEK2	2.24066	5.0762e-31
FAM111B	2.23935	8.04371e-41
TP63	2.23789	1.42889e-06
CDCA2	2.22873	3.5623e-44
DUSP9	2.22715	1.98149e-17
ARTN	2.22523	3.77436e-16
CENPM	2.22484	3.18147e-41
CDC25C	2.21491	1.36048e-55
GSDMC	2.21407	8.51503e-19
SPC25	2.21201	1.34331e-42
H2BC9	2.21044	7.72609e-16
RFC4	2.21013	1.6605e-34
RAD51AP1	2.2095	1.21532e-36
RAD51	2.20896	1.31292e-42
CDKN2A	2.20698	4.25794e-12
HROB	2.20242	1.29173e-43
PPP2R2C	2.2016	3.95857e-15
DAPL1	2.19688	7.5435e-07
EGLN3	2.19234	6.27693e-20
SLC7A11	2.19095	2.39745e-15
CTSV	2.18254	3.55466e-18
OIP5	2.17363	4.97338e-37
ESPN	2.1722	9.31056e-25
LY6K	2.16692	2.1897e-15
COL1A1	2.16147	1.2098e-18
PAFAH1B3	2.15645	9.6808e-61
LGALS7B	2.15048	5.489e-08
RAC3	2.14512	1.28478e-32
XDH	2.14367	2.07613e-25
ESPL1	2.14352	5.17436e-38
ECE2	2.14271	7.26083e-38
KRT6C	2.14206	3.05751e-07
MYEOV	2.13627	1.56382e-13
PRR11	2.13519	5.71688e-37
PPP1R14D	2.13435	9.2585e-10
XRCC2	2.13123	2.46226e-43
SERPINB13	2.13087	7.32163e-07
IGF2BP3	2.12988	4.73198e-19
CLCA2	2.12679	3.74867e-05
MAGEA6	2.12305	2.23059e-07
ANKRD22	2.12102	1.17657e-27
MAGEA4	2.10978	5.01248e-06
FANCI	2.10931	9.54918e-40
FUT2	2.10498	4.23878e-31
FAT2	2.09185	3.60446e-09
LGR4	2.0903	2.36851e-39
E2F8	2.09024	4.29232e-52
TMEM184A	2.08852	1.60298e-29
PLXNB3	2.08717	1.58846e-26
F12	2.0849	2.53347e-33
NEIL3	2.08442	6.61254e-36
CAPNS2	2.08355	1.09568e-07
ARNTL2	2.08232	2.50865e-21
APOBEC3B	2.08122	1.35752e-19
NME1	2.07893	1.80762e-69
PERP	2.0752	1.66419e-20
LAD1	2.07508	1.84413e-33
SIX2	2.06972	7.59547e-13
AK4	2.0686	5.8492e-26
KPNA2	2.06839	9.92091e-43
HOXC10	2.0639	2.22144e-11
BIK	2.05738	7.13792e-29
TNNT1	2.0456	8.70341e-11
C2CD4A	2.03863	2.74926e-18
PAEP	2.03852	8.77606e-07
CBX2	2.03812	1.3674e-21
C15orf48	2.03516	1.81499e-16
GBP6	2.03495	4.7873e-07
ARHGAP11A	2.03398	6.69925e-38
H2BC5	2.03182	7.0189e-32
NQO1	2.02593	7.30641e-13
SIX1	2.02226	6.73531e-25
UBE2S	2.02149	1.90453e-30
PGLYRP3	2.0193	1.43676e-11
SOX15	2.01909	2.48473e-10
STRA6	2.01656	3.28912e-20
BARX2	2.01103	4.6486e-15
CALML5	2.01057	3.84815e-06
TYMS	2.00864	3.07626e-39
CEACAM5	2.00789	1.8386e-05
TCN1	2.00169	2.61865e-08
GYPE	-2.00008	1.24649e-118
COL4A4	-2.00084	6.97169e-22
TBX2	-2.00412	2.43172e-40
CELF2	-2.00737	7.48132e-28
ICAM1	-2.00863	9.85593e-19
GATA2	-2.00931	2.03147e-35
PTGIS	-2.01325	8.32698e-26
CYBB	-2.01363	4.02661e-22
SYNE1	-2.01429	2.57715e-35
ANGPT4	-2.01443	2.92104e-181
ADGRE5	-2.01473	2.61564e-37
GJA5	-2.01566	1.40659e-29
SELENOP	-2.01743	9.48401e-25
CHRM1	-2.01786	6.29607e-114
TSPAN12	-2.01827	2.84116e-23
GRAMD2A	-2.01975	5.13845e-25
CD69	-2.02035	1.06448e-29
CD83	-2.02193	1.47785e-45
BMPER	-2.02197	3.1443e-43
CCN1	-2.02229	6.00812e-27
CCRL2	-2.02289	4.529e-43
TLR8	-2.02441	3.33218e-34
SYNPO	-2.02487	1.07741e-41
SCTR	-2.026	1.94314e-13
MYL9	-2.02642	1.35628e-39
RGN	-2.02725	7.0153e-28
SLC5A9	-2.02801	1.35816e-56
HPGDS	-2.02998	3.83966e-33
FRMD3	-2.03069	3.27379e-80
CHIA	-2.03183	9.02758e-18
FLI1	-2.03357	1.85227e-54
DKK2	-2.03397	1.7787e-41
S1PR4	-2.03402	8.16101e-40
GUCY1A2	-2.03668	8.48607e-68
PTPRM	-2.03821	2.75266e-39
NXPH3	-2.03996	1.81904e-75
ABLIM3	-2.04079	3.25065e-34
LIFR	-2.04156	1.30093e-26
HOPX	-2.04235	1.8506e-12
CAPSL	-2.04338	1.74808e-18
C1orf116	-2.0443	8.08105e-14
KLF4	-2.04438	9.55469e-24
USHBP1	-2.0444	4.83406e-106
HSPB7	-2.04703	8.3751e-45
C1QA	-2.04732	4.5685e-27
CES1	-2.04814	1.35184e-07
C10orf67	-2.04895	3.07123e-126
TMEM204	-2.04918	1.01479e-54
METTL7A	-2.05328	2.54763e-32
TNS2	-2.05388	4.49172e-45
MAL	-2.05421	8.48919e-23
ZBED2	-2.05473	6.44086e-26
SCNN1G	-2.0551	4.09351e-20
CORO2B	-2.05579	5.77691e-52
SPI1	-2.0561	1.14629e-35
GSTM5	-2.05801	4.51206e-70
MFSD2A	-2.05929	4.47336e-30
NEDD9	-2.06105	8.06119e-34
ZMYND10	-2.06214	5.23108e-22
F10	-2.0626	1.68257e-47
SLC14A1	-2.06302	8.52031e-49
MYOZ1	-2.06339	3.58088e-34
ATP1A2	-2.06427	5.57743e-69
RND1	-2.06523	4.74992e-15
KCNA3	-2.06781	2.73136e-31
CD5L	-2.06871	8.13864e-173
WNT7A	-2.06964	6.39048e-27
RASL12	-2.0697	2.27681e-47
S100A12	-2.07083	1.04066e-13
LMO7	-2.07088	3.61537e-31
NKX2-1	-2.07099	4.58366e-07
ICAM2	-2.0711	2.78062e-49
KANK2	-2.07371	2.4409e-50
STARD13	-2.0778	9.90468e-67
LIN7A	-2.08509	1.65382e-45
IL3RA	-2.0891	1.99269e-62
OTULINL	-2.08998	3.96025e-28
PLA1A	-2.09381	5.50632e-27
FCER1A	-2.09425	2.8254e-17
SELPLG	-2.09617	1.58038e-38
ENG	-2.09645	3.24891e-49
RASGRP4	-2.098	7.7767e-81
CTXND1	-2.09906	1.13792e-109
MSRB3	-2.10009	5.28914e-42
TMEM150B	-2.10138	2.04904e-42
NLRC4	-2.10183	2.26099e-75
C1QB	-2.10218	1.50036e-25
SMAD6	-2.10305	2.67312e-58
SOD3	-2.10309	6.00774e-28
HEG1	-2.10527	3.77849e-43
RXFP1	-2.10565	7.56214e-89
DPT	-2.10706	3.3979e-21
SULT1C4	-2.10742	5.69718e-45
PREX2	-2.10818	3.30736e-67
GIMAP1	-2.10827	4.90667e-57
MSLN	-2.10839	6.42977e-06
ID4	-2.10856	9.9926e-27
TLR4	-2.10872	1.66049e-38
NOTCH4	-2.10891	8.76557e-60
ST6GALNAC5	-2.11093	6.76404e-46
CD302	-2.11476	5.8085e-39
MORN5	-2.11507	2.66941e-22
MACROD2	-2.11614	1.0296e-27
SLC26A9	-2.11809	1.40328e-12
THBD	-2.12069	1.40419e-23
TSPAN7	-2.12389	7.06491e-16
HK3	-2.125	5.62822e-32
SORBS1	-2.12584	2.11281e-45
COX7A1	-2.1312	1.50565e-57
APLN	-2.13173	7.05023e-31
DNASE2B	-2.13522	8.72528e-62
TIMP3	-2.1371	1.41287e-30
CCDC69	-2.13726	9.75059e-43
WDR38	-2.13809	1.58907e-19
GPRIN2	-2.14063	5.07465e-25
MNDA	-2.14209	1.11343e-30
MS4A2	-2.14222	8.08991e-45
ACOXL	-2.14266	1.13428e-49
CAV2	-2.14295	3.9341e-36
NTN4	-2.14631	2.70594e-32
PAPSS2	-2.14639	1.42388e-30
AATK	-2.14814	9.23259e-36
SLCO2B1	-2.14974	3.61238e-29
NMUR1	-2.14976	3.94035e-104
ARRB1	-2.15087	8.10217e-28
PTH1R	-2.15375	8.37862e-62
AKAP12	-2.15499	5.58517e-26
SRPX	-2.15514	2.40501e-30
FFAR4	-2.15621	1.60523e-54
CFTR	-2.15904	1.66174e-24
PEAR1	-2.16208	2.5797e-66
CCL14	-2.16288	7.76199e-69
DENND2A	-2.16706	1.78314e-54
BCL6B	-2.1693	1.03193e-62
F8	-2.171	5.36225e-77
CLEC1A	-2.17123	4.20688e-64
GPC3	-2.17277	8.35425e-12
CAPN9	-2.17503	4.21666e-20
LTBP4	-2.17836	1.46286e-39
LYZ	-2.17906	2.19358e-16
RNASE1	-2.17919	2.09305e-18
JAML	-2.1795	4.11815e-42
TEKT1	-2.1853	7.12236e-26
CFP	-2.18621	1.81468e-72
TMPRSS2	-2.1872	1.4576e-14
CLEC12A	-2.19086	1.32651e-41
EDN1	-2.1922	1.68221e-27
CCDC85A	-2.19308	2.30641e-99
ACKR4	-2.19608	1.49239e-83
ALDH3B1	-2.19614	6.12797e-18
AOX1	-2.19684	1.61242e-38
FILIP1	-2.19746	7.18221e-41
GADD45B	-2.19754	1.78658e-46
FIBIN	-2.19794	3.24685e-30
EFEMP1	-2.20055	3.57852e-29
PCDH12	-2.20065	5.59667e-61
DEPP1	-2.20087	1.59341e-37
TMEM125	-2.20123	1.86139e-14
AQP9	-2.20177	2.46136e-30
C1orf194	-2.20402	4.78601e-22
CXCL3	-2.2055	3.01513e-29
ARHGEF26	-2.20579	7.55768e-33
ARHGAP44	-2.20704	1.63096e-37
ROR1	-2.20868	5.09051e-45
MGP	-2.21044	2.56024e-25
FGFBP2	-2.21339	4.26627e-11
CXCR2	-2.21572	6.36218e-49
FAM110D	-2.21609	1.49311e-81
CASS4	-2.21648	4.52682e-54
LEPR	-2.21676	4.2893e-53
IHH	-2.21824	5.54888e-43
ARHGAP6	-2.21832	9.49982e-93
CSF3R	-2.21835	4.26919e-25
AGTR1	-2.21876	4.75394e-59
RS1	-2.22003	1.3311e-187
TPSB2	-2.22531	2.97502e-20
ADAMTS1	-2.22629	3.56701e-34
PPP1R14A	-2.22705	5.09572e-43
DACH1	-2.2287	1.94563e-42
ACE	-2.23253	2.36917e-52
FOS	-2.23478	2.74196e-25
HBEGF	-2.23679	5.18668e-33
C9orf24	-2.23801	4.44472e-21
TRPV2	-2.23995	5.22558e-57
CD34	-2.24438	8.33283e-62
SHROOM4	-2.24963	5.48797e-44
SLPI	-2.2507	1.11945e-14
CD300LF	-2.25369	1.57464e-39
NPNT	-2.25412	4.92146e-27
NOSTRIN	-2.2566	4.89599e-43
GYPC	-2.25842	1.26455e-55
ERG	-2.25864	7.45955e-74
SLC11A1	-2.26067	4.33056e-47
ADGRE1	-2.26092	4.21438e-53
CASQ2	-2.26153	8.43983e-74
CYBRD1	-2.26511	3.22193e-43
MAOB	-2.26515	2.08554e-31
PRAM1	-2.26722	9.4517e-58
TREM1	-2.26734	4.22123e-19
FOLR3	-2.26736	2.20457e-48
NECAB1	-2.26957	6.3591e-77
HPGD	-2.2728	1.8329e-14
FAM167A	-2.27345	3.73366e-30
MS4A8	-2.27532	8.8788e-17
CADM1	-2.27647	3.13659e-25
C1orf162	-2.27659	2.58493e-47
RXRG	-2.27669	2.77653e-58
CX3CR1	-2.27723	1.10661e-40
IL7R	-2.27845	1.92031e-31
FCGR3B	-2.28099	6.0245e-34
FAXDC2	-2.28604	3.78426e-26
PKNOX2	-2.2895	3.08921e-80
BMP5	-2.29113	4.79654e-22
ANXA3	-2.29301	8.37412e-34
CPED1	-2.2964	1.17657e-57
ZFP36	-2.29742	1.36748e-40
BMP2	-2.29923	9.20116e-30
PF4	-2.29987	5.96663e-61
CYP27A1	-2.30023	2.77023e-33
RASIP1	-2.30049	1.13835e-54
ADAMTSL3	-2.30327	1.64628e-57
DOK2	-2.30391	3.44234e-44
RHOJ	-2.30793	4.22844e-73
NR0B2	-2.30937	1.44837e-17
WNT3A	-2.30978	3.33605e-26
SHE	-2.31044	1.44183e-27
SERPINA1	-2.31417	2.27568e-14
GIMAP7	-2.31455	6.28554e-44
FGG	-2.31653	1.51932e-06
XAGE2	-2.31849	5.28911e-20
PDZD2	-2.3194	4.21355e-38
HBA1	-2.32321	9.49607e-110
ITM2A	-2.325	1.604e-41
GATA6	-2.32687	1.26643e-42
SPAAR	-2.32843	8.51755e-127
PTPN21	-2.33838	2.10069e-74
RSPO4	-2.34022	5.82324e-36
TPSAB1	-2.34343	8.60024e-28
ADAMTSL4	-2.34359	7.04428e-42
MMRN2	-2.34649	3.39047e-62
MMP19	-2.34687	2.89778e-44
DPYSL2	-2.34706	4.23518e-42
CYYR1	-2.35359	2.80856e-67
SOX7	-2.35851	1.83041e-33
ANKRD29	-2.36369	6.98693e-36
CD300C	-2.36687	7.1813e-54
AFF3	-2.36723	7.29746e-64
MAP1LC3C	-2.37097	4.81887e-32
TCEAL2	-2.37278	4.01943e-41
RSPO2	-2.37855	4.38156e-73
CXCL5	-2.3845	1.41724e-16
TAL1	-2.38487	7.25795e-102
TAMALIN	-2.38553	2.77736e-59
PHACTR1	-2.38567	1.65157e-67
FPR1	-2.38661	2.27602e-37
TGFBR2	-2.39048	2.38084e-46
COL4A3	-2.39164	5.26445e-28
ARC	-2.39438	5.9124e-68
GLDN	-2.39498	1.8123e-68
SEMA5A	-2.3969	7.42242e-35
C5AR1	-2.39786	5.56904e-51
FGR	-2.3991	2.15349e-53
STARD8	-2.4014	3.50107e-75
ROS1	-2.40241	1.0583e-16
C11orf96	-2.40494	1.95586e-36
PID1	-2.40595	4.5832e-41
KL	-2.40701	9.34252e-68
GLIPR2	-2.40966	3.13943e-64
SELE	-2.41728	4.55338e-37
LMOD1	-2.41932	2.99242e-44
RSPO1	-2.42073	3.23869e-128
TGFBR3	-2.42144	6.86248e-47
HSPB8	-2.42219	5.35663e-36
KHDRBS2	-2.424	2.1679e-46
TMEM88	-2.42561	3.21894e-68
LILRA5	-2.42817	1.94574e-56
ALKAL2	-2.43293	5.52853e-64
ST8SIA6	-2.4354	3.02939e-72
DUSP1	-2.43547	7.72882e-36
IGSF10	-2.43715	2.21294e-49
STEAP4	-2.43756	1.987e-16
CAMP	-2.43861	8.21595e-55
SVEP1	-2.44401	3.65804e-57
CCM2L	-2.44481	3.32514e-91
PCOLCE2	-2.44733	1.83681e-31
SLCO2A1	-2.44797	4.65651e-30
SEMA3B	-2.44909	2.62941e-28
TIE1	-2.45376	2.00352e-67
MYADM	-2.45474	1.19332e-46
FXYD1	-2.4548	2.51981e-128
SLC51B	-2.45849	8.62727e-42
GIMAP6	-2.4604	1.15643e-54
DPEP2	-2.46118	3.45505e-67
RAI2	-2.46433	6.11797e-59
CXCR1	-2.46498	8.12658e-60
C14orf132	-2.46879	6.93816e-51
MME	-2.47095	4.39939e-28
KRT4	-2.47222	4.34017e-12
PRELP	-2.47841	3.28165e-30
APOH	-2.48164	1.25247e-17
FGD5	-2.48306	7.2419e-70
FOXA2	-2.48323	4.79818e-15
ALOX15B	-2.48338	1.34696e-17
SPARCL1	-2.4846	3.43553e-44
ARHGAP31	-2.49126	2.26477e-60
PIP5K1B	-2.49596	2.24024e-50
SCN4B	-2.49977	7.7126e-55
TENT5B	-2.50242	2.52265e-39
WWC2	-2.50252	1.40484e-69
CA3	-2.50356	1.03278e-45
CPAMD8	-2.52043	1.34372e-32
ALOX5	-2.52315	2.40521e-40
MYOC	-2.5253	1.99219e-117
PGM5	-2.53548	2.96259e-53
ADGRD1	-2.54085	1.65365e-34
GRK5	-2.54266	3.34399e-83
FAM216B	-2.54527	2.75867e-28
FLRT3	-2.54741	8.53496e-26
ZBTB16	-2.55137	1.49694e-49
MMP28	-2.55437	2.89048e-20
SFRP5	-2.55471	4.08509e-38
RBP2	-2.55611	3.00961e-77
OSCAR	-2.55798	3.9306e-50
GPRC5A	-2.55899	5.63599e-21
NR4A1	-2.56418	3.34328e-31
STAC	-2.56438	4.35737e-43
JCAD	-2.57016	3.92492e-59
RRAD	-2.57198	1.42129e-22
SSTR1	-2.5727	5.5159e-51
CPA3	-2.57282	3.95462e-27
KLF2	-2.57523	1.09887e-46
DUOX1	-2.5794	1.29589e-32
COLEC12	-2.57962	3.6348e-38
ATP13A4	-2.58035	1.47371e-22
GNG11	-2.58097	5.42417e-48
SLIT2	-2.59125	1.42467e-55
LRRN3	-2.59193	1.01511e-86
SH2D3C	-2.59299	4.43078e-89
CALCRL	-2.59394	3.23521e-69
MYH11	-2.59439	9.8855e-25
NR4A3	-2.59523	2.36855e-41
ANGPTL1	-2.59709	3.56737e-88
FCN1	-2.60783	5.40614e-46
IL6	-2.60828	6.38245e-27
ANGPT1	-2.61035	7.62235e-59
SIRPB1	-2.61042	4.79203e-75
ECSCR	-2.61682	1.58565e-95
C1QTNF7	-2.61927	2.17478e-79
FBP1	-2.62155	9.2434e-27
IL33	-2.62834	6.00496e-34
SOX17	-2.63032	1.70237e-93
CGNL1	-2.63353	1.81712e-48
MYCT1	-2.63387	1.19097e-83
ITIH5	-2.63583	7.26609e-52
CLIC3	-2.63705	3.09041e-29
SGCA	-2.63821	8.78828e-51
FBLN5	-2.63984	4.24129e-48
SELP	-2.64177	1.2537e-53
LIMCH1	-2.6433	6.52659e-32
AGR3	-2.64999	1.53059e-12
NRGN	-2.65144	1.70647e-27
HSPA12B	-2.65758	6.86578e-92
MS4A7	-2.65937	3.60375e-49
LRRC32	-2.66261	1.20591e-71
FAM162B	-2.66884	6.73847e-69
TMEM139	-2.66965	3.50375e-35
ESAM	-2.67004	2.48594e-63
STXBP6	-2.67829	9.00851e-54
CDO1	-2.67848	1.80801e-66
PI16	-2.67945	3.5246e-65
MYRF	-2.68208	1.04743e-37
FOXF1	-2.6881	1.20151e-75
EMP2	-2.69504	9.97542e-75
F11	-2.69596	9.03328e-91
SCEL	-2.69971	7.9963e-22
TNS1	-2.70177	1.33385e-54
SGCG	-2.70307	5.17118e-72
SEC14L6	-2.70593	3.19781e-43
DNASE1L3	-2.70657	1.10013e-53
JAM2	-2.71553	1.15724e-96
SLC19A3	-2.71836	1.41713e-80
COX4I2	-2.72075	2.54154e-64
CLEC14A	-2.72919	1.16233e-74
ALOX5AP	-2.73195	2.20675e-43
ANOS1	-2.74567	7.77253e-45
SOSTDC1	-2.75371	2.6638e-17
ARHGEF15	-2.75494	5.44616e-91
SPN	-2.75494	2.8391e-55
ALPL	-2.75622	6.79926e-24
LIMS2	-2.76763	2.30312e-90
CSRNP1	-2.7698	2.40838e-74
HYAL1	-2.78429	8.26143e-43
CD93	-2.79015	1.27165e-63
CNTN6	-2.79261	6.14548e-120
MMRN1	-2.79939	4.67898e-59
CFD	-2.80018	3.48871e-47
TBX4	-2.80126	3.29144e-53
SEMA3G	-2.80576	3.0026e-90
CCBE1	-2.80581	4.04595e-57
PECAM1	-2.81462	2.66503e-86
SELENBP1	-2.81764	8.01435e-22
MGAT3	-2.82651	3.39384e-42
GIMAP8	-2.8371	3.58353e-74
MSR1	-2.83912	7.90914e-46
MT1A	-2.84609	4.53187e-29
SFTA3	-2.84735	7.45884e-13
ITGA8	-2.84804	3.46938e-60
SLC1A1	-2.85192	8.4971e-45
ACADL	-2.85451	2.02543e-70
ATOH8	-2.85653	3.65902e-30
SCUBE1	-2.85725	3.04035e-126
EFCC1	-2.86122	5.03742e-77
PLA2G4F	-2.86535	4.47618e-46
CCN5	-2.86879	2.10204e-59
KANK3	-2.87214	2.09562e-103
GRIA1	-2.87449	3.77572e-128
LDB2	-2.87478	1.38848e-98
LRRN4	-2.88637	1.8292e-22
ITLN1	-2.88825	7.089e-51
C8B	-2.89166	4.27404e-59
ADGRF5	-2.89272	1.18266e-26
PTGDS	-2.8983	5.7083e-35
ZNF385B	-2.90188	1.69721e-36
ACVRL1	-2.92095	3.69033e-103
FPR2	-2.92482	1.31645e-79
PTPRB	-2.9405	3.52665e-83
LRRC36	-2.95144	1.91775e-75
TPPP3	-2.95285	2.57679e-37
CHI3L2	-2.9554	9.998e-37
STX11	-2.95613	7.76624e-84
CD52	-2.95757	4.03206e-50
VIPR1	-2.98613	1.15262e-66
CLDN5	-2.98656	7.50127e-61
ADRB2	-2.993	5.34886e-70
RASGRF1	-2.9947	4.29079e-50
AGRP	-2.99728	8.34099e-101
NCKAP5	-2.99771	5.41918e-84
VWF	-2.99973	6.11529e-61
EPAS1	-3.00035	2.46506e-76
RAMP2	-3.006	1.60051e-101
PLAC9	-3.0076	5.27987e-84
COL6A6	-3.01025	1.69696e-74
FGFR4	-3.03166	2.12254e-56
CCL23	-3.03904	1.73449e-63
SLIT3	-3.05033	2.97565e-60
ADRB1	-3.06128	8.5646e-61
PRG4	-3.08075	1.30243e-45
CD300LG	-3.08467	4.87957e-187
SLC46A2	-3.09335	5.00975e-47
ECRG4	-3.1152	1.00571e-51
GPA33	-3.1289	1.77021e-89
A2M	-3.14691	3.36935e-51
PIGR	-3.15648	5.32116e-13
EMCN	-3.16382	4.95192e-84
VSIG4	-3.16484	2.95363e-44
ABCA8	-3.16909	7.63494e-94
SCARA5	-3.17061	2.65283e-57
CDH5	-3.17353	5.11745e-90
RAMP3	-3.17835	8.90147e-88
ABI3BP	-3.18109	1.2313e-65
OGN	-3.18749	4.9891e-55
MT1M	-3.18819	1.27024e-50
DLC1	-3.19659	7.17462e-53
ROBO4	-3.19765	9.36495e-105
RBP4	-3.19795	2.77115e-37
FHL5	-3.21859	1.18968e-100
VSIG2	-3.22176	3.98054e-25
C16orf89	-3.23384	1.01112e-13
SFTA2	-3.24296	6.29822e-11
HIGD1B	-3.244	1.75344e-93
CXCL2	-3.24844	2.8059e-34
RGCC	-3.25193	4.3789e-98
KCNK3	-3.25599	1.2095e-54
LAMP3	-3.25729	8.33221e-50
SERTM1	-3.25765	1.04268e-126
MYZAP	-3.26055	5.93886e-119
HSD17B6	-3.26352	4.7367e-46
C20orf85	-3.26556	6.55301e-20
SCGB3A2	-3.27788	8.46335e-12
PRX	-3.28894	9.40137e-92
CD36	-3.29024	2.39833e-64
SLC39A8	-3.29717	8.70991e-60
GPX3	-3.29867	1.2397e-58
S1PR1	-3.30417	6.68773e-92
SLC34A2	-3.3053	9.15524e-14
SCN7A	-3.31426	4.29337e-62
NPR1	-3.32523	1.55534e-80
AQP1	-3.33412	1.58023e-36
ACKR1	-3.35607	1.50602e-41
OLR1	-3.37058	3.60405e-48
IL1RL1	-3.3876	5.24765e-77
PDK4	-3.389	3.63263e-41
FOLR1	-3.38991	2.27333e-16
AGTR2	-3.40831	1.20699e-43
PPBP	-3.42419	1.36065e-51
HSPB6	-3.42677	1.08011e-64
C4BPA	-3.43996	1.06571e-15
LRRK2	-3.44132	3.53188e-41
FAM189A2	-3.44714	1.17914e-60
HHIP	-3.45971	6.71106e-64
BTNL9	-3.48014	5.4258e-74
AOC3	-3.48498	1.11619e-64
DMBT1	-3.49703	2.81228e-20
MRC1	-3.49744	2.79201e-43
VEPH1	-3.51012	2.40287e-63
TEK	-3.52061	1.98429e-108
TNXB	-3.53044	1.17655e-79
NAPSA	-3.53447	1.26467e-12
LYVE1	-3.54081	1.45921e-94
NDNF	-3.58173	7.36716e-30
SPOCK2	-3.60373	1.14891e-71
ABCA3	-3.60501	3.33392e-32
FMO2	-3.6057	1.17802e-63
C7	-3.61047	4.41934e-33
LPL	-3.62062	1.24977e-44
CHRDL1	-3.64347	2.32655e-48
MAMDC2	-3.67843	5.31225e-64
CAV1	-3.69755	1.88955e-70
SCGB3A1	-3.70595	5.22687e-15
CRTAC1	-3.71638	8.00823e-38
TCF21	-3.72709	2.89771e-100
RTKN2	-3.75358	1.63518e-117
CAVIN2	-3.81454	3.9301e-66
CSF3	-3.8323	1.58916e-56
MFAP4	-3.83461	1.78573e-55
SFTPB	-3.87977	4.85124e-13
GDF10	-3.88315	2.46427e-87
GPM6A	-3.90203	7.70116e-160
EDNRB	-3.90461	1.90683e-100
FHL1	-4.03298	3.81081e-90
CACNA2D2	-4.06549	5.53346e-45
ADAMTS8	-4.08947	1.22166e-104
GGTLC1	-4.09268	1.20683e-31
SUSD2	-4.14389	9.52177e-39
GPD1	-4.1512	1.94973e-112
FOSB	-4.15901	3.24078e-43
RETN	-4.1662	1.92572e-64
PLA2G1B	-4.17184	6.69867e-47
LGI3	-4.18121	4.69351e-67
MARCO	-4.24471	1.30669e-44
DES	-4.26973	6.43274e-65
CPB2	-4.2926	1.22803e-63
MS4A15	-4.42197	5.17235e-45
HBA2	-4.43743	1.47665e-63
CLEC3B	-4.4917	1.00843e-94
INMT	-4.52001	3.78106e-75
GPIHBP1	-4.54183	3.24296e-108
UPK3B	-4.55568	6.20149e-63
VEGFD	-4.57486	8.30164e-91
SFTPD	-4.58151	3.64446e-28
ITLN2	-4.58159	2.65469e-109
TNNC1	-4.60252	3.41673e-71
CLIC5	-4.61283	1.07049e-82
WIF1	-4.6771	1.2993e-37
TMEM100	-4.69	1.09924e-86
CA4	-4.70367	8.50816e-129
AQP4	-4.71367	2.67451e-41
PEBP4	-4.75178	6.33502e-42
CYP4B1	-4.80351	4.84013e-39
PGC	-4.87701	2.47777e-20
GKN2	-4.91244	1.01667e-59
FCN3	-4.93294	3.13493e-94
HBB	-4.95677	9.73696e-57
SLC6A4	-4.96416	1.4629e-159
FAM107A	-5.02149	4.29633e-120
ADH1B	-5.04762	1.48239e-61
ANKRD1	-5.11129	2.30642e-108
MCEMP1	-5.13998	1.60421e-88
SCGB1A1	-5.31498	1.77098e-23
FABP4	-5.3704	2.01451e-78
SFTPA2	-5.83974	1.37127e-25
SFTPA1	-6.1384	2.15428e-27
CLDN18	-6.60293	1.13692e-67
AGER	-6.65812	6.97634e-92
SFTPC	-8.83014	3.18308e-49
